# Supplementary material for: Synthesis, structure and characterization of Cd2TeO3Cl2 with unprecedented [Cd2O6Cl4] octahedral dimers
Source: Royal Society of Chemistry journal article supplement (doi:10.1039/d3dt02515b), 2023-01-01
Supplement: d3dt02515b1.pdf [file d3dt02515b1.pdf]

## Electronic Supplementary Information

### Synthesis, structure and characterizations of $\text{Cd}_2\text{TeO}_3\text{Cl}_2$ with unprecedented $[\text{Cd}_2\text{O}_6\text{Cl}_4]$ octahedral dimers

Linan Wang,<sup>a,b,‡</sup> Chen Bai,<sup>a,‡</sup> Yingying Kong,<sup>a</sup> Maqsood Iqbal,<sup>a</sup> Yu Chu<sup>a,b\*</sup> and Junjie Li<sup>a,b\*</sup>

*<sup>a</sup>Research Center for Crystal Materials; CAS Key Laboratory of Functional Materials and Devices for Special Environments, Xinjiang Technical Institute of Physics & Chemistry, CAS, Urumqi 830011, China*

*<sup>b</sup>Center of Materials Science and Optoelectronics Engineering, University of Chinese Academy of Sciences, Beijing 100049, China*

<sup>‡</sup> These authors contributed equally.

\*Corresponding author: [chuy@ms.xjb.ac.cn](mailto:chuy@ms.xjb.ac.cn) (Yu Chu), [lijunjie@ms.xjb.ac.cn](mailto:lijunjie@ms.xjb.ac.cn) (Junjie Li)

## CONTEXT

**Table S1** Atomic coordinates ( $\times 10^4$ ), equivalent isotropic displacement parameters ( $\text{\AA}^2 \times 10^3$ ) and bond valence calculations (BVSs) for  $\text{Cd}_2\text{TeO}_3\text{Cl}_2$ .

**Table S2** Bond lengths [ $\text{\AA}$ ] and angles [deg] for  $\text{Cd}_2\text{TeO}_3\text{Cl}_2$ .

**Fig. S1** The EDS spectrum, SEM image and EDS mappings of  $\text{Cd}_2\text{TeO}_3\text{Cl}_2$ .

**Fig. S2** The powder XRD patterns of  $\text{Cd}_2\text{TeO}_3\text{Cl}_2$  before and after heating experiments, where  $\text{CdCl}_2$  (PDF #09-0401) and  $\text{CdTeO}_3$  (PDF #22-0129) XRD patterns used as the references.

**Table S1** Atomic coordinates ( $\times 10^4$ ), equivalent isotropic displacement parameters ( $\text{\AA}^2 \times 10^3$ ) and bond valence calculations (BVSs) for  $\text{Cd}_2\text{TeO}_3\text{Cl}_2$ .

| Atom  | Wyckoff | x       | y       | z       | U(eq) | BVS  |
|-------|---------|---------|---------|---------|-------|------|
| Cd(1) | 2i      | 7250(1) | 1783(1) | 4616(1) | 14(1) | 1.71 |
| Cd(2) | 2i      | 2826(1) | 4411(1) | 2670(1) | 14(1) | 1.91 |
| Te(1) | 2i      | 7729(1) | 7602(1) | 2421(1) | 11(1) | 3.95 |
| O(1)  | 2i      | 9069(3) | 4972(3) | 3535(3) | 16(1) | 2.17 |
| O(2)  | 2i      | 4888(3) | 6641(3) | 2973(3) | 18(1) | 2.07 |
| O(3)  | 2i      | 6658(3) | 8359(3) | 4661(2) | 13(1) | 2.08 |
| Cl(1) | 2i      | 3049(1) | 6959(1) | -853(1) | 21(1) | 0.77 |
| Cl(2) | 2i      | 8516(1) | -768(1) | 7539(1) | 18(1) | 0.72 |
| GII   |         |         |         |         | 0.182 |      |

[a] The bond valence sum is calculated by bond-valence theory ( $S_{ij} = \exp[(R_0 - R)/B]$ , where  $R$  is an empirical constant,  $R_0$  is the length of bond I (in angstroms), and  $B = 0.37$ ).

[b] The global instability index (GII) calculated using:

$$G = \sqrt{\frac{\sum_{i=1}^n (BVS - v_i)}{N}}$$

where  $N$  is the number of atoms in the formula unit. The GII is calculated as 0.182 which is lower than 0.2 indicating the rationality of the structure from this side.

**Table S2** Bond lengths [Å] and angles [deg] for Cd<sub>2</sub>TeO<sub>3</sub>Cl<sub>2</sub>.

|                      |            |                       |             |
|----------------------|------------|-----------------------|-------------|
| Cd(1)-O(1)           | 2.2374(17) | O(3)#1-Cd(1)-Cl(2)#2  | 146.56(4)   |
| Cd(1)-O(2)#1         | 2.4199(17) | O(3)#4-Cd(1)-O(2)#1   | 125.77(6)   |
| Cd(1)-O(3)#1         | 2.3674(16) | O(3)#4-Cd(1)-O(3)#1   | 76.11(6)    |
| Cd(1)-O(3)#4         | 2.3063(16) | O(3)#4-Cd(1)-Cl(2)    | 79.92(4)    |
| Cd(1)-Cl(1)#3        | 2.8816(7)  | O(3)#4-Cd(1)-Cl(2)#2  | 77.84(4)    |
| Cd(1)-Cl(2)          | 2.6528(6)  | O(3)#4-Cd(1)-Cl(1)#3  | 80.63(4)    |
| Cd(1)-Cl(2)#2        | 2.7893(6)  | Cl(2)-Cd(1)-Cl(1)#3   | 154.518(18) |
| Cd(2)-O(1)#6         | 2.2765(16) | Cl(2)-Cd(1)-Cl(2)#2   | 82.66(2)    |
| Cd(2)-O(2)           | 2.2228(17) | Cl(2)#2-Cd(1)-Cl(1)#3 | 77.270(17)  |
| Cd(2)-O(3)#1         | 2.3298(17) | O(1)#6-Cd(2)-O(3)#1   | 105.16(6)   |
| Cd(2)-Cl(1)          | 2.6450(6)  | O(1)#6-Cd(2)-Cl(1)    | 86.45(5)    |
| Cd(2)-Cl(1)#3        | 2.7369(6)  | O(1)#6-Cd(2)-Cl(1)#3  | 158.84(5)   |
| Cd(2)-Cl(2)#5        | 2.7174(6)  | O(1)#6-Cd(2)-Cl(2)#5  | 80.00(4)    |
| Te(1)-O(1)           | 1.8801(16) | O(2)-Cd(2)-O(1)#6     | 117.67(6)   |
| Te(1)-O(2)           | 1.8481(17) | O(2)-Cd(2)-O(3)#1     | 88.59(6)    |
| Te(1)-O(3)           | 1.8986(16) | O(2)-Cd(2)-Cl(1)      | 94.73(5)    |
| O(1)-Cd(1)-O(2)#1    | 78.36(6)   | O(2)-Cd(2)-Cl(1)#3    | 81.97(5)    |
| O(1)-Cd(1)-O(3)#1    | 121.79(6)  | O(2)-Cd(2)-Cl(2)#5    | 160.50(5)   |
| O(1)-Cd(1)-O(3)#4    | 155.69(6)  | O(3)#1-Cd(2)-Cl(1)    | 164.78(4)   |
| O(1)-Cd(1)-Cl(1)#3   | 87.01(5)   | O(3)#1-Cd(2)-Cl(1)#3  | 81.81(4)    |
| O(1)-Cd(1)-Cl(2)#2   | 79.06(4)   | O(3)#1-Cd(2)-Cl(2)#5  | 78.16(4)    |
| O(2)#1-Cd(1)-Cl(1)#3 | 125.50(4)  | Cl(1)-Cd(2)-Cl(1)#3   | 83.954(19)  |
| O(2)#1-Cd(1)-Cl(2)   | 79.55(4)   | Cl(1)-Cd(2)-Cl(2)#5   | 94.59(2)    |
| O(2)#1-Cd(1)-Cl(2)#2 | 146.59(4)  | Cl(2)#5-Cd(2)-Cl(1)#3 | 82.025(19)  |
| O(3)#1-Cd(1)-O(2)#1  | 66.85(6)   | O(1)-Te(1)-O(3)       | 94.69(7)    |
| O(3)#1-Cd(1)-Cl(1)#3 | 78.13(4)   | O(2)-Te(1)-O(1)       | 101.79(8)   |
| O(3)#1-Cd(1)-Cl(2)   | 112.66(4)  | O(2)-Te(1)-O(3)       | 89.47(7)    |

Symmetry transformations used to generate equivalent atoms:

#1 -x+1,-y+1,-z+1    #2 -x+2,-y,-z+1    #3 -x+1,-y+1,-z

#4 x,y-1,z    #5 -x+1,-y,-z+1    #6 x-1,y,z    #7 x,y+1,z

#8 x+1,y,z

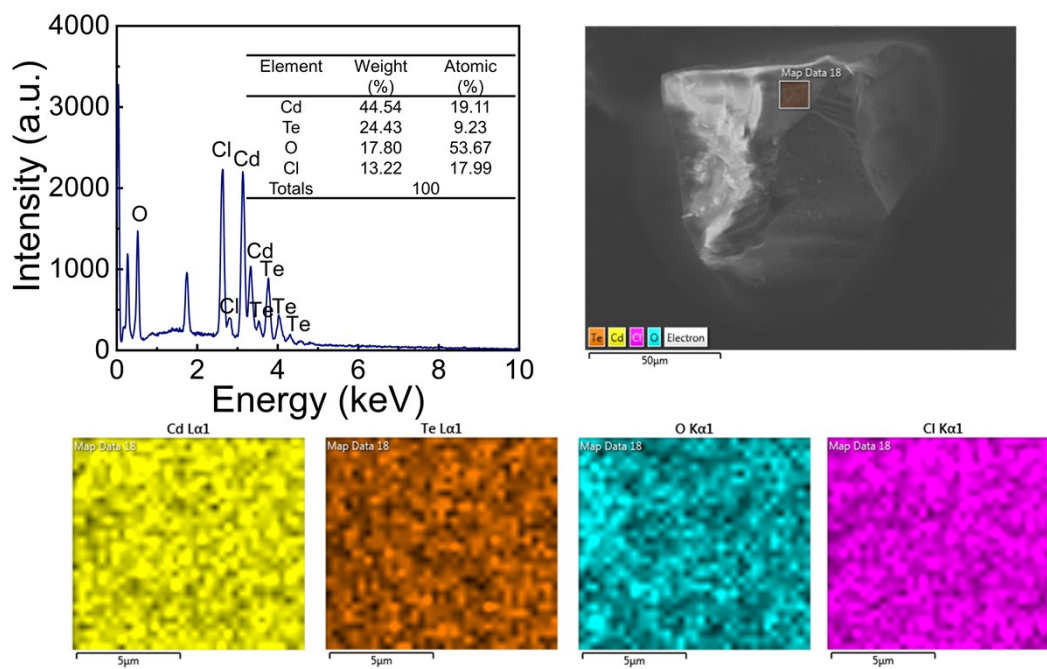

**Fig. S1** The EDS spectrum, SEM image, and EDS mappings of  $\text{Cd}_2\text{TeO}_3\text{Cl}_2$ .

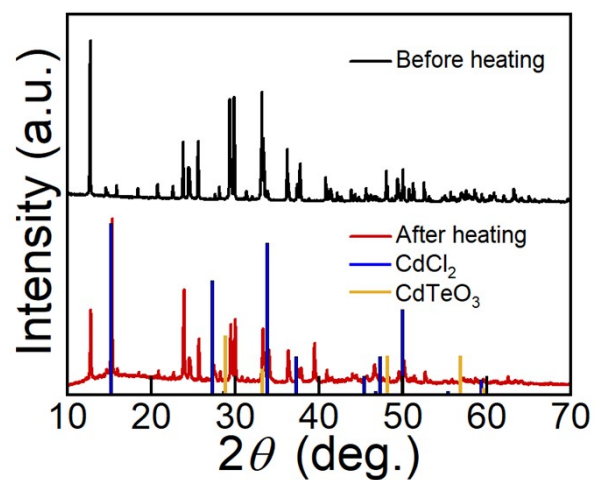

**Fig. S2** The powder XRD patterns of  $\text{Cd}_2\text{TeO}_3\text{Cl}_2$  before and after heating experiments, where  $\text{CdCl}_2$  (PDF #09-0401) and  $\text{CdTeO}_3$  (PDF #22-0129) XRD patterns used as the references.
